# Supplementary material for: Lesion-site-dependent responses to therapy after aphasic stroke
Source: PubMed Central journal article supplement (PMC6288693; doi:10.1136/jnnp-2017-317446), 2018-04-17
Supplement: jnnp-2017-317446supp001.pdf [file jnnp-2017-317446supp001.pdf]

## 1 **Supplementary material**

### 2 **1. Testing of reading accuracy:**

3 Words with high written frequency (SUBTLEXWF > 50) were selected from the SUBTLEX database <sup>1</sup>.  
4 High frequency words were chosen to maximise the ecological utility of the therapy. All words  
5 were three to six letters long so that they could easily be read in one fixation. Hyphenated or  
6 punctuated words were excluded, and an effort was made to avoid regular morphological variants  
7 of the same word (e.g. eat, eaten, eating). Words of all classes (nouns, verbs, function, etc.) were  
8 included, including both high and low imageability words.

9 Three matched lists of 180 words were created (A, B and C). For each word on list A there  
10 was a corresponding word on lists B and C closely matched for letter length, syllable length,  
11 written frequency and imageability. Additionally, the 50 highest frequency words (mostly function  
12 words) were selected as a separate list of 'Core' words.

13 All 590 words were tested at baseline (split across T1 and T2 sessions). Results from this  
14 full corpus of testing items were used to establish the participants' profiles of reading impairment.  
15 Based on each participant's baseline performance, a customised set of 150 matched words from  
16 each of the A, B and C lists were selected to use in training and subsequent assessments. This  
17 ensured the A, B and C lists selected for that patient were matched for baseline reading  
18 performance (word reading accuracy and RT). Furthermore the lists remained matched for  
19 psycholinguistic variables.

20 The A, B and C Word-Lists were assigned to be either trained in Block1 (data used in this  
21 paper), trained in Block2 or not to be trained (untrained words). List allocations were  
22 counterbalanced between participants. All 50 Core words were trained in both Block1 and Block2  
23 due to their high utility.

24 From the customised 150-item A, B and C word lists, a subset of 90 items from each list  
25 were selected for use in all subsequent assessment time-points (T3-T6). These 90-item testing lists  
26 were matched for baseline performance and psycholinguistic variables. Importantly, the overall  
27 accuracy of the word lists selected for testing was matched to Baseline reading accuracy to avoid  
28 the risk of regression to the mean at future time-points.

29

30

1    **2.       Central Alexia and its treatment**

2    All participants in this study were assessed as suffering from Central Alexia (CA). CA is an acquired  
3    reading disorder in the context of more generally impaired language (aphasia)<sup>2</sup>. Patients with CA  
4    are slow to read, make frequent errors and have additional problems with spoken language.  
5    Following the Connectionist ‘triangle model’ of reading, variants of CA are caused by damage to  
6    one of two routes linking orthography (how a word looks) to phonology (how it sounds): a direct  
7    route and an indirect route mediated by semantic processes (what the word means)<sup>3</sup>. Damage to  
8    the direct route primarily affects pseudoword reading, and is commonly called ‘phonological  
9    dyslexia’, though severe cases (called ‘deep dyslexia’) may involve semantic errors as well<sup>4</sup>. By  
10   contrast, damage to the semantically mediated route impairs irregular word reading, and is called  
11   ‘surface dyslexia’<sup>5</sup>.

12           iReadMore, the treatment in this study, is an application installed on the participants’  
13   computers, for use at home<sup>6</sup>. The application works by involving patients in massed practice of  
14   single-word reading, supported by multi-modal cueing (e.g. the word ‘CAR’ is presented along with  
15   a picture of a car, and the sound of a person saying the word). Participants used the application for  
16   four weeks at home in each treatment block: our main analysis is concerned with the first of those  
17   treatment blocks, with treatment response measured as the absolute change in participants’  
18   single-word reading accuracy on words encountered during the treatment (i.e. trained items).  
19   Absolute change in reading accuracy is expressed as a percentage of the total number of items in  
20   the assessment that participants could read correctly. Although accuracy was calculated  
21   separately for both trained and untrained words, in this study we only reported reading accuracy  
22   change on trained items (i.e. where we expected to see the response to treatment expressed).  
23   Change was chosen as the dependent variable because the sample of patients recruited in this  
24   study had variable severity of reading impairments at baseline.

25

26

27

3. **Supplementary table:** Demographic and clinical information on each patient.

| Patient ID | Age (years) | Sex M/F | Time post-stroke (months) | Lesion Volume (cm <sup>3</sup> ) | Handedness R/L | CA subtype | Baseline reading accuracy (%) | Pre-treatment (T3) reading accuracy (%) | Post-treatment (T4) reading accuracy | Reading absolute change (%) |
|------------|-------------|---------|---------------------------|----------------------------------|----------------|------------|-------------------------------|-----------------------------------------|--------------------------------------|-----------------------------|
| <b>P01</b> | 44          | M       | 94                        | 240.9                            | R              | D          | 58.4                          | 31.7                                    | 63.3                                 | <b>31.7</b>                 |
| <b>P04</b> | 52          | M       | 66                        | 122.7                            | R              | P          | 71.1                          | 65.6                                    | 84.4                                 | <b>18.9</b>                 |
| <b>P02</b> | 50          | M       | 82                        | 304.5                            | R              | D          | 40.3                          | 26.1                                    | 43.3                                 | <b>17.2</b>                 |
| <b>P21</b> | 58          | F       | 41                        | 297.7                            | R              | P          | 59.5                          | 67.2                                    | 83.3                                 | <b>16.1</b>                 |
| <b>P08</b> | 67          | M       | 107                       | 11.7                             | R              | D          | 12.5                          | 18.3                                    | 30.8                                 | <b>12.5</b>                 |
| <b>P22</b> | 42          | M       | 13                        | 43.7                             | L              | P          | 74.9                          | 76.7                                    | 88.9                                 | <b>12.2</b>                 |
| <b>P09</b> | 43          | F       | 55                        | 399.2                            | R              | D          | 58.2                          | 75.0                                    | 86.7                                 | <b>11.7</b>                 |
| <b>P17</b> | 60          | M       | 16                        | 102.6                            | R              | D          | 28.1                          | 34.2                                    | 44.2                                 | <b>10.0</b>                 |
| <b>P05</b> | 56          | F       | 93                        | 149.8                            | R              | S          | 63.8                          | 52.2                                    | 60.6                                 | <b>8.3</b>                  |
| <b>P23</b> | 26          | F       | 81                        | 161.9                            | R              | D          | 75.5                          | 72.2                                    | 78.9                                 | <b>6.7</b>                  |
| <b>P15</b> | 54          | M       | 39                        | 189.7                            | R              | P          | 47.3                          | 62.2                                    | 68.3                                 | <b>6.1</b>                  |
| <b>P16</b> | 73          | M       | 158                       | 205.2                            | R              | D          | 20.0                          | 20.0                                    | 25.8                                 | <b>5.8</b>                  |
| <b>P20</b> | 72          | M       | 101                       | 243.3                            | R              | D          | 13.4                          | 20.0                                    | 25.8                                 | <b>5.8</b>                  |
| <b>P10</b> | 61          | M       | 19                        | 195.6                            | R              | D          | 3.4                           | 11.7                                    | 16.7                                 | <b>5.0</b>                  |
| <b>P19</b> | 50          | F       | 72                        | 141.3                            | R              | P          | 35.9                          | 41.1                                    | 46.1                                 | <b>5.0</b>                  |
| <b>P13</b> | 54          | M       | 24                        | 149.3                            | R              | P          | 91.5                          | 90.0                                    | 94.4                                 | <b>4.4</b>                  |
| <b>P06</b> | 55          | F       | 75                        | 151.2                            | R              | P          | 91.9                          | 96.1                                    | 100.0                                | <b>3.9</b>                  |
| <b>P11</b> | 52          | M       | 12                        | 31.2                             | R              | P          | 96.3                          | 88.9                                    | 92.8                                 | <b>3.9</b>                  |
| <b>P14</b> | 56          | M       | 23                        | 45.1                             | R              | P          | 80.4                          | 86.1                                    | 89.4                                 | <b>3.3</b>                  |
| <b>P07</b> | 33          | F       | 59                        | 181                              | R              | P          | 90.1                          | 93.3                                    | 96.1                                 | <b>2.8</b>                  |
| <b>P12</b> | 50          | F       | 14                        | 59.4                             | R              | P          | 90.6                          | 94.4                                    | 96.7                                 | <b>2.2</b>                  |
| <b>P18</b> | 78          | M       | 22                        | 128.5                            | L              | P          | 75.4                          | 77.8                                    | 80.0                                 | <b>2.2</b>                  |
| <b>P03</b> | 64          | M       | 25                        | 102.7                            | R              | P          | 96.7                          | 99.4                                    | 96.7                                 | <b>-2.8</b>                 |

R= right; L= left; CA= central alexia; P= phonological alexia; S= surface alexia; D= deep alexia. In bold, absolute change in reading accuracy after treatment (dependent variable).

#### 4. Supplementary figure: study design.

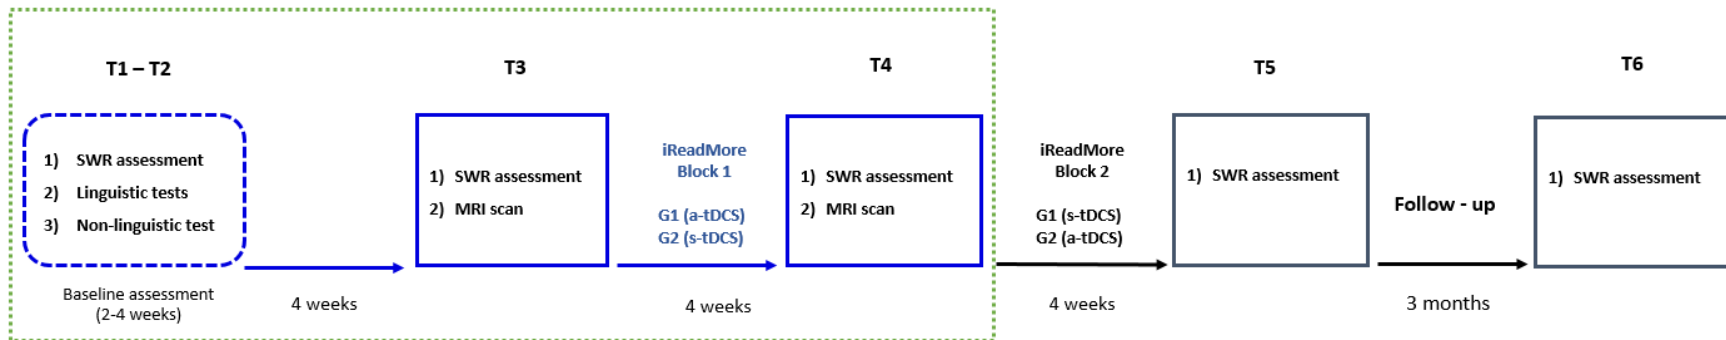

The current study (T1 - T4, within the green dotted line) is a subset of a larger longitudinal study (T1– T6). It involved baseline behavioural testing (T1 – T2), and pre-treatment and post-treatment (T3-T4) reading testing and MRI scan. In the first block of therapy, participants received behavioural training (iReadMore) and tDCS for 4 weeks. For tDCS, patients were randomly allocated in two groups to receive real or sham tDCS. The larger study (outside green dotted line) included a second block of therapy and tDCS. In this block, for tDCS patients received the opposite stimulation to the received in block 1. SWR= single-word reading task; MRI= structural magnetic resonance imaging; G=group; tDCS: transcranial direct current stimulation; a-tDCS: anodal tDCS; s-tDCS: sham tDCS

1 **5. MRI data acquisition and pre-processing**

2 At T3 each patient underwent a quantitative multi-parameter mapping protocol at 3T (Magnetom  
3 TIM Trio, Siemens Healthcare, Erlangen, Germany) using a standard 32 channel head coil for signal  
4 reception. The sequence parameters were as described in <sup>7</sup> with the exceptions that the FLASH  
5 data were acquired with 1mm isotropic resolution and a field of view of 256mm (HF) x 240mm  
6 (AP, 44 reference lines) x 176mm (RL, 40 reference lines) <sup>8</sup>. Using the data from this protocol,  
7 maps of magnetisation transfer saturation were calculated as described in <sup>9</sup>. These maps were  
8 subsequently used as input to a unified segmentation algorithm <sup>10</sup>, which was optimized for use in  
9 patients with focal brain lesions <sup>11</sup>. The segmentation routine resulted in a binary lesion image for  
10 each patient, in standard MNI space. Lesion volume was calculated from that image.

11 We also encoded the lesion images by lesion load (percentage of damage) in a series of  
12 anatomically defined regions of the brain: 0% if the region was completely preserved by a patient's  
13 lesion(s), rising to 100% when the region was completely destroyed. We extracted 398 regions for  
14 this process, from a series of publically available atlases of grey and white matter regions <sup>12-15</sup>. The  
15 aim here was to cover the whole brain (i.e. GM and WM), encoding patients' lesions with minimal  
16 a priori assumptions concerning what lesion locations might be most relevant to the patients'  
17 treatment responses. We further reduced the resulting data by including only those (69) regions  
18 where at least 10 patients' lesions had destroyed at least 10% of the region; this was deemed  
19 necessary to exclude regions for which reliable correlations between lesion load and treatment  
20 response could not be measured.

21 The multi-parameter mapping protocol was preferred because we hoped to use it to  
22 identify longitudinal structural changes associated with therapy, which are more mechanistically  
23 interpretable than those that can be derived from traditional grey and white matter segmented  
24 images (this is in preparation). In this sense, the use of this protocol is not strictly required for this  
25 study. But the MT images derived from this process are also more than suitable for lesion  
26 segmentation, using the Automatic Lesion Identification toolbox, and the results were assessed by  
27 eye, by a neurologist (APL) to confirm this.

28  
29  
30  
31  
32  
33

1 **6. Baseline behavioural assessment - Instruments**

2 Patients' baseline behavioural abilities (T1 – T2) were assessed with an extensive protocol  
3 including linguistic and non-linguistic tests, yielding a total of 36 pre-treatment behavioural  
4 variables for each patient.

5

6 **Linguistic tasks:**

7 1) Single-word reading (SWR): this task was designed to assess single-words reading at each  
8 time point. All words from the A, B, C and Core training lists described above (590 words in  
9 total) were tested at the baseline (T1 and T2). Words were presented in a random order  
10 using E-prime software. Words were displayed in black, lower case, size 36 Arial font on a  
11 grey background. Participants were instructed to read the words aloud into a voice-key  
12 microphone as fast and accurately as they could. Participants were given up to four  
13 seconds to read the word: responses after this time were scored as incorrect. Reaction  
14 time was recorded by the voice-key. The outcome measures were percentage accuracy  
15 and mean reaction times.

16

17 2) Pseudoword reading: 20 pseudowords were generated using Wuggy software<sup>16</sup>. Items  
18 were between three and six letters in length and were made up of plausible letter  
19 combinations. Pseudowords were presented in using E-prime and displayed in black, lower  
20 case, size 36, Arial font on a grey background. The outcome measures were percentage  
21 accuracy and mean reaction times (RT).

22

23

24 3) Written semantic matching: three words were displayed on the screen in each trial using  
25 E-prime. One word at the top of the screen was the 'probe', and the task was to decide  
26 which of the two words displayed below it were most semantically related to the probe.  
27 Participants were instructed to read the three words silently to identify the target as fast  
28 as they could with a button press. Accuracy and reaction times were recorded.

29

30 4) Written sentence to picture matching (sentence reading): This task was created to assess  
31 silent reading for meaning. It consisted of 60 trials, presented in E-prime, in which patients  
32 silently read a sentence of between five and eight words. They were requested to read  
33 each sentence as fast as they could. A picture was then displayed on screen and the  
34 participant responded verbally whether the picture was congruent with the sentence or  
35 not (50% were congruent). Outcome measures were percentage accuracy on the picture  
36 decision task and sentence reading speed in words per minute (WPM).

37

38 5) Neale Analysis of Reading Ability test: In this task, participants read aloud two  
39 simple passages of standardized prose<sup>17</sup>. If a participant is unable to read a word within  
40 four seconds, it was provided by the experimenter. Comprehension questions were asked

1 after each text was read. The test has three components: reading accuracy, reading speed  
2 and reading comprehension.

- 3
- 4 6) Communication Disability Profile<sup>18</sup>: this is a patient-reported questionnaire for aphasic  
5 patients focused on activities of daily life. Only the reading section was tested before  
6 therapy started to provide a self-report measure of reading ability. It consists of four  
7 questions asking for silent reading of: 1) a single word; 2) a headline; 3) a whole story in a  
8 paper; and, 4) a letter. Outcome measure: overall score (maximum score = 16).  
9
- 10 7) Naming objects and naming actions of the Comprehensive Aphasia Test<sup>19</sup>: these tasks  
11 include respectively 24 and 5 black and white drawn pictures. Participants were instructed  
12 to retrieve the name of the picture or find the word to describe the action. The outcome  
13 measure was total score from both tests (maximum score = 58).  
14
- 15 8) Digit span of the Wechsler Adult Intelligence Scale IV<sup>20</sup>. This task was used to test  
16 attentional span and verbal working memory. This subtest involves repetition of number  
17 strings forward and backward. The outcome measure was total score from both tests  
18 transformed into a scaled score.  
19
- 20 9) Auditory discrimination task<sup>21</sup>: this task assesses acoustic-phonological perception. It was  
21 used to provide a measure of the participant's ability to discriminate phonemes. The task  
22 consisted of three auditory non-words displayed in E-prime. In each trial the first or last  
23 stimulus is identical to the stimulus in the middle. Participants were instructed to identify  
24 the odd-one-out by button press. The outcome measure was the score, calculated by  
25 averaging the last 4 levels accomplished.

## 26

### 27 **Non-Linguistic tasks**

- 28 10) Pyramids and Palm Trees (pictorial version)<sup>22</sup>: this task was used to test access to  
29 visual semantic information. The task consists of 52 trials. In each trial three pictures are  
30 shown (a probe picture and two pictures below). One picture is a semantically-related  
31 target and the other an unrelated distractor. Participants were asked to select the pictures  
32 semantically-related to the target picture. The outcome measure was total score  
33 (maximum score = 52).  
34
- 35 11) Subtests 1 and 2 of the Cattell Culture Fair test<sup>23</sup>: these subtests were used to examine  
36 fluid intelligence and reasoning. Subtest 1 is a pattern completion task (12 trials).  
37 Participants had to choose which drawing out of five options, completed the pattern.  
38 Subtest 2 is an odd-one-out task (14 trials). Five black and white drawings were presented

1 and participants had to identify the odd-one-out. The outcome measure was total score  
2 from both subtests (maximum score = 26).

3  
4 12) Two-Armed Bandit Task: this task is a modified version of the decision making task used to  
5 assess environmental and reinforcement learning abilities <sup>24</sup>. This task consisted of 220  
6 trials presented in Matlab. Participants were instructed to select one of two boxes, and to  
7 try and judge which box had the highest probability of producing a reward (probability  
8 changed trial by trial according to Gaussian random walk). The outcome measure was the  
9 percentage of trials where the patient selected the box with the highest probability  
10 (optimal choice).

11  
12 13) A non-verbal version of the Sustained Attention to Response Task (SART) <sup>25</sup>: this is a go/no-  
13 go task presented in E-Prime. In each trial one of two pictures of different men is displayed  
14 on the screen (one man represents the 'go' trial and the other represents is the 'no go'  
15 trial). Participants were instructed to press a button each time the go picture was shown,  
16 but to withhold their response when the no-go picture was displayed. There were 191 go  
17 trials and 24 no-go trials. Five measures are derived from this test: accuracy; errors of  
18 omission (failing to press on a 'go' trial); errors of commission (pressing on a 'no-go' trial);  
19 post-error slowing; and reaction times to correct 'go' trials.

20  
21 14) Brixton spatial anticipation test <sup>26</sup>: This test assesses executive functions including  
22 reasoning, anticipation, cognitive control, solving problems, and cognitive flexibility. This  
23 task consists of 55 trials using the same template formed of ten circles with one coloured  
24 blue. Participants were instructed to point to where the blue position would be in the next  
25 trial, according to a pattern. The outcome measure was the number of errors and then  
26 transformed in a scaled score.

27  
28 15) Visual short-term memory task: this task was created to test visual short-term and visual  
29 working memory. It consists of 14 trials presented in E-prime. Participants saw five grey  
30 squares located horizontally. In each trial, some of the squares were lit up in a particular  
31 order. Participants were instructed to remember and reproduce the sequence by button  
32 press. The outcome measure was the total number of sequences correctly reproduced  
33 (maximum score= 14).

34  
35 16) 4-Way Weigl <sup>27</sup>: this is an alternative version of the WCST used to test executive functions  
36 including solving problems, cognitive flexibility, behaviour to achieving a goal, and  
37 response inhibition. Participants were presented with 12 coloured plastic tokens. They  
38 were instructed to sort the tokens in one of up to four options (colour, shape, symbol and  
39 texture). The outcome measure was total score (maximum score= 12). Moreover,  
40 secondary variables were also calculated: 1) the number of failures to completethe sort  
41 (more than 2 tokens are left unsorted); and 2) Perseveration type A was the repetition of a



- 1 previous sort. Perseveration type B involved the interruption of a correct sort to reverse
- 2 the tokens to a previous sort.
- 3

## 7. Details of the Analyses

Our explanatory (in-sample) analyses involve deriving multivariable models which best explain the patients' responses to treatment. We use the Automatic Linear Modelling facility (ALM) distributed within the SPSS software package to build these models. The ALM facilities implements a stepwise, forward feature selection process: starting with an empty model, the process adds the single predictor whose addition most optimises (minimises) the resulting model's Akaike Information Criterion (AIC). The process then proceeds in iterations, greedily optimising the model by adding the best new predictor to those already selected, until no new feature's addition confers improvement greater than a penalty for increasing model complexity<sup>28</sup>.

We repeat this process three times: (a) with only the 28 pre-treatment behavioural and 4 demographic variables; (b) with only the 69 lesion location variables, extracted from structural MRI and encoded using anatomically defined regions of interest (as described in section 5); and (c) with all of the data together. Each analysis yields an AIC value, and while these values are not meaningful in themselves, the differences between them can be expressed as Bayes Factors, which quantify the relative evidence that one model whose AIC value is better (lower) than another, is in fact the better model. Specifically, Bayes Factor =  $\exp((AIC1 - AIC2) / 2)$ , where AIC2 is the smaller (better) of the pair. Bayes Factors >150 imply 'very strong' evidence in favour of the better model<sup>29</sup>.

Our predictive analysis embeds the explanatory analysis within a leave-one-out cross-validation. This analysis proceeds in folds; in each fold, a single 'test' patient is removed from the sample, and the remaining 'training' patients are used to train a multivariable model defined using the SPSS ALM, as before. In this case, we also employ boosting within each fold, which creates a series of N models rather than a single model, in each fold of the analysis: here, we use N=10, which is the default setting in SPSS. Boosting produces a succession of "component models", each of which is built on the entire dataset. Prior to building each successive component model, the records are weighted based on the previous component model's residuals. Cases with large residuals are given relatively higher analysis weights so that the next component model will focus on predicting these records well. Together these component models form an ensemble model. The ensemble model scores new records by taking the mean prediction from the component models.

1        **8. Analyses of change at longer-term follow-up**

2        Our main analysis is focused on change observed immediately post-treatment, but therapy effects  
3        are usually not consistently maintained over time after the therapy ends<sup>30</sup>. This begs the question  
4        of whether: (a) longer-term therapy effects are best explained by the same pre-treatment  
5        variables which best explained the immediate treatment responses; and (b) longer-term therapy  
6        effects are also predictable from pre-treatment data.

7                We cannot answer the first question directly, because 2 of our original 23 patients  
8        dropped out of the study before their longer-term treatment effects could be measured (~3  
9        months post-treatment). Nevertheless, we did test whether a model including all of the variables  
10       in our best (combined data) model for the immediate treatment responses, could also explain  
11       those later therapy effects. When fitted to the follow-up data, this model has an AIC of 78.0  
12       (adjusted  $R^2 = 0.18$ ): this result cannot be directly compared to that in the main text, because each  
13       refers to different patients and data, but our best model for treatment responses immediately  
14       post-treatment clearly does not capture longer-term treatment effects as well.

15               However, those later responses do still appear to be predictable, as assessed following the  
16       method used in our original predictive analysis:  $r$  (predicted response, empirical response) = 0.55,  
17        $p = 0.009$ . Predictions made using models driven only by: (a) pre-treatment behavioural and  
18       demographic data; or (b) neuroimaging data; were not significantly correlated with empirical  
19       responses ( $r = 0.40$ ,  $p = 0.08$ , and  $r = 0.22$ ,  $p = 0.35$ , respectively), though this was marginal for the  
20       ‘behaviour + demographics’ analysis. In any case, this underlines our central point that individual  
21       patients’ therapy responses are in principle predictable, from pre-treatment data alone, and that  
22       the combination of pre-treatment behavioural data, demographic data, and lesion location data, is  
23       required to make those predictions well.

24

## 1 **Supplementary References**

- 2 1. Brysbaert M, New B. Moving beyond Kucera and Francis: a critical evaluation of current word  
3 frequency norms and the introduction of a new and improved word frequency measure  
4 for American English. *Behavior research methods* 2009;**41**(4):977-90.
- 5 2. Leff A, Starrfelt R. *Alexia: diagnosis, treatment and theory*: Springer Science & Business Media,  
6 2013.
- 7 3. Plaut DC, McClelland JL, Seidenberg MS, et al. Understanding normal and impaired word  
8 reading: computational principles in quasi-regular domains. *Psychological review*  
9 1996;**103**(1):56.
- 10 4. Crisp J, Howard D, Lambon Ralph MA. More evidence for a continuum between phonological  
11 and deep dyslexia: Novel data from three measures of direct orthography-to-phonology  
12 translation. *Aphasiology* 2011;**25**(5):615-41.
- 13 5. Woollams AM, Ralph MAL, Plaut DC, et al. SD-squared: on the association between semantic  
14 dementia and surface dyslexia. *Psychological review* 2007; **114**(2):316.
- 15 6. Woodhead ZVJ, Penny W, Barnes GR, et al. Reading therapy strengthens top-down connectivity  
16 in patients with pure alexia. *Brain : a journal of neurology* 2013; **136**(8):2579-91.
- 17 7. Callaghan MF, Josephs O, Herbst M, et al. An evaluation of prospective motion correction (PMC)  
18 for high resolution quantitative MRI. *Frontiers in Neuroscience* 2015;**9**:97.
- 19 8. Helms G, Dathe H, Dechent P. Quantitative FLASH MRI at 3T using a rational approximation of  
20 the Ernst equation. *Magnetic resonance in medicine* 2008;**59**(3):667-72.
- 21 9. Weiskopf N, Suckling J, Williams G, et al. Quantitative multi-parameter mapping of R1, PD(\*),  
22 MT, and R2(\*) at 3T: a multi-center validation. *Frontiers in Neuroscience* 2013;**7**:95.
- 23 10. Ashburner J, Friston KJ. Unified segmentation. *NeuroImage* 2005; **26**(3):839-51.
- 24 11. Seghier ML, Ramlakhansingh A, Crinion J, et al. Lesion identification using unified  
25 segmentation-normalisation models and fuzzy clustering. *NeuroImage* 2008;**41**(4):1253-  
26 66.
- 27 12. Oishi KF, A. F.; van Zijl P. C. M.; Mori, S. *MRI Atlas of Human White Matter*, 2011.
- 28 13. Hua K, Zhang J, Wakana S, et al. Tract probability maps in stereotaxic spaces: analyses of white  
29 matter anatomy and tract-specific quantification. *NeuroImage* 2008;**39**(1):336-47.
- 30 14. Tzourio-Mazoyer N, Landeau B, Papathanassiou D, et al. Automated Anatomical Labeling of  
31 Activations in SPM Using a Macroscopic Anatomical Parcellation of the MNI MRI Single-  
32 Subject Brain. *NeuroImage* 2002;**15**(1):273-89.
- 33 15. Eickhoff SB, Stephan KE, Mohlberg H, et al. A new SPM toolbox for combining probabilistic  
34 cytoarchitectonic maps and functional imaging data. *NeuroImage* 2005;**25**(4):1325-35.
- 35 16. Keuleers E, Brysbaert M. Wuggy: A multilingual pseudoword generator. *Behavior research*  
36 *methods* 2010;**42**(3):627-33.
- 37 17. Neale MD. *Neale analysis of reading ability: Reader*: ERIC, 1999.
- 38 18. Chue WL, Rose ML, Swinburn K. The reliability of the Communication Disability Profile: A  
39 patient-reported outcome measure for aphasia. *Aphasiology* 2010;**24**(6-8):940-56.
- 40 19. Swinburn K, Porter, G., and Howard, D. *Comprehensive Aphasia Test*: Psychology Press, 2004.
- 41 20. Wechsler D. Wechsler adult intelligence scale—Fourth Edition (WAIS—IV). San Antonio, Texas:  
42 Psychological Corporation 2014.
- 43 21. Robson H, Keidel JL, Ralph MA, et al. Revealing and quantifying the impaired phonological  
44 analysis underpinning impaired comprehension in Wernicke's aphasia. *Neuropsychologia*  
45 2012;**50**(2):276-88.
- 46 22. Howard D, Patterson KE. *The Pyramids and Palm Trees Test: A test of semantic access from*  
47 *words and pictures*: Thames Valley Test Company, 1992.

- 1 23. Cattell RB, Cattell A. *Cattell Culture Fair Intelligence Test: A Measure of "g"*: Bobbs-Merrill,  
2 1960.
- 3 24. Chowdhury R, Guitart-Masip M, Lambert C, et al. Dopamine restores reward prediction errors  
4 in old age. *Nature neuroscience* 2013;**16**(5):648.
- 5 25. Manly T, Davison B, Heutink J, et al. Not enough time or not enough attention? Speed, error  
6 and self-maintained control in the Sustained Attention to Response Test (SART). *Clinical*  
7 *Neuropsychological Assessment* 2000;**3**(10).
- 8 26. Burgess P, Shallice T. *The Hayling and Brixton tests — Manual*. London: Thames Valley Test  
9 Company: Harcourt Assessment, 1997.
- 10 27. Beglinger LJ, Unverzagt FW, Beristain X, et al. An updated version of the Weigl discriminates  
11 adults with dementia from those with mild impairment and healthy controls. *Archives of*  
12 *clinical neuropsychology : the official journal of the National Academy of*  
13 *Neuropsychologists* 2008;**23**(2):149-56.
- 14 28. Akaike H. Akaike's Information Criterion. In: Lovric M, ed. *International Encyclopedia of*  
15 *Statistical Science*. Berlin, Heidelberg: Springer Berlin Heidelberg, 2011:25-25.
- 16 29. Kass RE, Raftery AE. Bayes Factors. *Journal of the American Statistical Association*  
17 1995;**90**(430):773-95.
- 18 30. Beeson PM, Robey RR. Evaluating single-subject treatment research: Lessons learned from the  
19 aphasia literature. *Neuropsychology review* 2006;**16**(4):161-69.
- 20
